# Supplementary material for: Effectiveness of a 6-Month Isoniazid on Prevention of Incident Tuberculosis Among People Living with HIV in Eritrea: A Retrospective Cohort Study
Source: PubMed Central journal article supplement — Infect Dis Ther. 2022 Jan 29;11(1):559–79. doi: 10.1007/s40121-022-00589-w (PMC8847634; doi:10.1007/s40121-022-00589-w), 2022-01-29
Supplement: 40121_2022_589_MOESM1_ESM.pdf [file 40121_2022_589_MOESM1_ESM.pdf]

# **Effectiveness of a six-month isoniazid on prevention of incident tuberculosis among people living with HIV in Eritrea: a retrospective cohort study**

Mulugeta Russom<sup>1,2,6</sup>, Henok G. Woldu<sup>3</sup>, Araia Berhane<sup>4</sup>, Daniel YB. Jeannetot<sup>2</sup>, Bruno H. Stricker<sup>5</sup>, Katia Verhamme<sup>2</sup>

<sup>1</sup>Eritrean Pharmacovigilance Centre, National Medicines and Food Administration, Ministry of Health, Asmara, Eritrea.

<sup>2</sup>Department of Medical Informatics, Erasmus Medical Centre, Rotterdam, the Netherlands.

<sup>3</sup>The Center for Health Analytics for National and Global Equity, Columbia, MO, USA.

<sup>4</sup>Communicable Disease Control Division, Department of Public Health, Ministry of Health, Asmara, Eritrea.

<sup>5</sup>Department of Epidemiology, Erasmus Medical Centre, Rotterdam, the Netherlands.

<sup>6</sup>European Program for Pharmacovigilance and Pharmacoepidemiology, University of Bordeaux, Bordeaux, France.

**Correspondence:** Mulugeta Russom, e-mail: [satiswt@gmail.com](mailto:satiswt@gmail.com)

| S1: Classification of patients' level of adherence to ART/IPT in Eritrea during the study period conducted between November 1, 2014 and November 1, 2020 |            |                                                                                                |
|----------------------------------------------------------------------------------------------------------------------------------------------------------|------------|------------------------------------------------------------------------------------------------|
| Adherence category to ART/IPT                                                                                                                            | definition | Remarks                                                                                        |
| Good                                                                                                                                                     | >95%       | A patient was considered as having 'good' adherence if he/she missed $\leq 3$ doses per month. |
| Fair                                                                                                                                                     | 85-94%     | A patient was considered as having 'fair' adherence if he/she missed 4-8 doses per month.      |
| Poor                                                                                                                                                     | <85%       | A patient was considered as having 'poor' adherence if he/she missed $\geq 9$ doses per month. |
| <i>ART: Anti-Retroviral Therapy; IPT: Isoniazid Preventive Therapy</i>                                                                                   |            |                                                                                                |

**S2: Study Questionnaire**  
**Effectiveness of Isoniazid Preventive Therapy on the Prevention of Tuberculosis**  
**among People Living with HIV in Eritrea: a Retrospective Cohort Study - 2020**

**Part I: Area/patient Identification**

|                                                            |                                                                                     |
|------------------------------------------------------------|-------------------------------------------------------------------------------------|
| Zoba.....                                                  | <input type="text"/>                                                                |
| Hospital .....                                             | <input type="text"/>                                                                |
| Exposure status [HAART + IPT = 1 and HAART only = 2] ..... | <input type="text"/>                                                                |
| Patient serial number ( <i>start with 0001</i> ).....      | <input type="text"/> <input type="text"/> <input type="text"/> <input type="text"/> |

**Part II: Patient socio-demographic characteristics**

| S/No | Questions and Filter                                                                        | Coding Categories                                                                               | Skip  |
|------|---------------------------------------------------------------------------------------------|-------------------------------------------------------------------------------------------------|-------|
| 201. | Patient card number                                                                         | _____                                                                                           |       |
| 202. | Age of the patient in completed years<br>( <i>take first recorded within study period</i> ) | <input type="text"/> <input type="text"/>                                                       |       |
| 203. | Sex of the patient                                                                          | Male ..... 1<br>Female ..... 2                                                                  |       |
| 204. | Body weight in completed Kgs<br>( <i>take first recorded within study period</i> )          | <input type="text"/> <input type="text"/> <input type="text"/>                                  |       |
| 205. | Level of education                                                                          | No formal education ..... 1<br>Primary ..... 2<br>Secondary ..... 3<br>Higher education ..... 4 |       |
| 206. | Residence                                                                                   | Asmara ..... 1<br>Outside Asmara ..... 2<br>Other ..... 3                                       |       |
| 207. | Known history of smoking?                                                                   | Yes ..... 1<br>No ..... 2<br>Unknown ..... 3                                                    | } 209 |
| 208. | Smoking status                                                                              | Current smoker ..... 1<br>Former smoker ..... 2<br>Unknown ..... 3                              |       |
| 209. | Known history of alcohol use?                                                               | Yes ..... 1<br>No ..... 2<br>Unknown ..... 3                                                    |       |
| 210. | CD4 count ( <i>take first record during the study period</i> )                              | _____                                                                                           |       |
| 211. | Viral load ( <i>take first record during the study period</i> )                             | _____                                                                                           |       |
| 212. | Employment status                                                                           | Employed ..... 1<br>Unemployed ..... 2<br>Unknown ..... 3                                       |       |
| 213. | Any co-morbidities?                                                                         | Yes ..... 1<br>No ..... 0                                                                       | → 215 |
| 214. | What are the co-morbidities?                                                                | Diabetes ..... A<br>Hypertension ..... B<br>Cancer ..... C<br>COPD ..... D                      |       |

|                                                                   |                                                                                                                                                                  |                                                                                                                                              |       |
|-------------------------------------------------------------------|------------------------------------------------------------------------------------------------------------------------------------------------------------------|----------------------------------------------------------------------------------------------------------------------------------------------|-------|
|                                                                   |                                                                                                                                                                  | Other (specify).....E                                                                                                                        |       |
| 215.                                                              | Any history of malnutrition during the study period?                                                                                                             | Yes ..... 1<br>No ..... 2<br>Unknown ..... 3                                                                                                 |       |
| 216.                                                              | Any history of prison during the study period?                                                                                                                   | Yes ..... 1<br>No ..... 2<br>Unknown ..... 3                                                                                                 |       |
| 217.                                                              | Any history of close contact with a person having TB during the study period?                                                                                    | Yes ..... 1<br>No ..... 2<br>Unknown ..... 3                                                                                                 |       |
| 218.                                                              | Current follow-up status?                                                                                                                                        | Still on follow-up ..... 1<br>Transferred ..... 2<br>Lost-to-follow up ..... 3<br>Died ..... 4                                               | } 301 |
| 219.                                                              | Date of death                                                                                                                                                    | ___/ ___/___ (date/month/year)                                                                                                               |       |
| 220.                                                              | Possible cause of death<br>(Multiple answers are possible)                                                                                                       | TB ..... 1<br>Other OIs including pneumonia ..... 2<br>Hepatic injury ..... 3<br>Cancer ..... 4<br>Other, specify ..... 6<br>Unknown ..... 5 |       |
| <b>Part III: Exposure status, adherence and treatment outcome</b> |                                                                                                                                                                  |                                                                                                                                              |       |
| 301.                                                              | Date HAART started?                                                                                                                                              | ___/ ___/___ (date/month/year)                                                                                                               |       |
| 302.                                                              | Date of last follow-up (in years or months)                                                                                                                      | ___/ ___/___ (date/month/year)                                                                                                               |       |
| 303.                                                              | Type of HAART patient has taken during the study period?<br>(If patient has shifted to multiple regimens, take the regimen taken for the longest period of time) | Nevirapine based ..... 1<br>Efavirenz based ..... 2<br>Second-line ..... 3<br>Other (specify) ..... 4                                        |       |
| 304.                                                              | Level of adherence of patient towards HAART?                                                                                                                     | Good ..... 1<br>Fair ..... 2<br>Poor ..... 3<br>Unknown ..... 4                                                                              |       |
| 305.                                                              | Has the patient received IPT?                                                                                                                                    | Yes ..... 1<br>No ..... 2                                                                                                                    | → 310 |
| 306.                                                              | Any history of interruption of IPT?                                                                                                                              | Yes ..... 1<br>No ..... 2<br>Unknown ..... 3                                                                                                 |       |
| 307.                                                              | Date IPT started?                                                                                                                                                | ___/ ___/___ (date/month/year)                                                                                                               |       |
| 308.                                                              | Date last refill of IPT?                                                                                                                                         | ___/ ___/___ (date/month/year)                                                                                                               |       |
| 309.                                                              | Total number of INH tablets/doses supplied (excluding the last refill)?                                                                                          | _____                                                                                                                                        |       |
| 310.                                                              | Was the patient diagnosed with TB?                                                                                                                               | Yes ..... 1<br>No ..... 2<br>Unknown ..... 3                                                                                                 | } End |
| 311.                                                              | When was the patient diagnosed with TB?<br>(Multiple answers are possible)                                                                                       | Before Nov. 1, 2014 ..... A<br>After Nov. 1, 2014 ..... B                                                                                    |       |
| 312.                                                              | If patient was diagnosed after November 1, 2014, was it before initiation of IPT?                                                                                | Yes ..... 1<br>No ..... 2                                                                                                                    |       |

|      |                                                                                                               |                                           |  |
|------|---------------------------------------------------------------------------------------------------------------|-------------------------------------------|--|
|      | <i>(If patient did not receive IPT, choose 'non applicable')</i>                                              | Unknown ..... 3<br>Not applicable ..... 4 |  |
| 313. | Date patient diagnosed with TB <i>(provide means of diagnosis in the last column of the respective dates)</i> | ___/ ___/ ____ <i>(date/month/year)</i>   |  |
|      |                                                                                                               | ___/ ___/ ____ <i>(date/month/year)</i>   |  |
|      |                                                                                                               | ___/ ___/ ____ <i>(date/month/year)</i>   |  |

**Part IV: Data collector's detail:** Name: \_\_\_\_\_ Tel: \_\_\_\_\_ Sig. \_\_\_\_\_

S3: Listing form for excluded cases of a study that assessed the effectiveness of Isoniazid Preventive Therapy (IPT) in people living with HIV in Eritrea conducted between Nov 1, 2014 and Nov 1, 2020

Hospital: \_\_\_\_\_

| Serial No. | Card number | Reason for exclusion<br>(code A, B, C, D, E or F as per the below listed criteria) | Serial No. | Card number | Reason for exclusion<br>(code A, B, C, D, E or F as per the below listed criteria) |
|------------|-------------|------------------------------------------------------------------------------------|------------|-------------|------------------------------------------------------------------------------------|
| 1.         |             |                                                                                    | 26.        |             |                                                                                    |
| 2.         |             |                                                                                    | 27.        |             |                                                                                    |
| 3.         |             |                                                                                    | 28.        |             |                                                                                    |
| 4.         |             |                                                                                    | 29.        |             |                                                                                    |
| 5.         |             |                                                                                    | 30.        |             |                                                                                    |
| 6.         |             |                                                                                    | 31.        |             |                                                                                    |
| 7.         |             |                                                                                    | 32.        |             |                                                                                    |
| 8.         |             |                                                                                    | 33.        |             |                                                                                    |
| 9.         |             |                                                                                    | 34.        |             |                                                                                    |
| 10.        |             |                                                                                    | 35.        |             |                                                                                    |
| 11.        |             |                                                                                    | 36.        |             |                                                                                    |
| 12.        |             |                                                                                    | 37.        |             |                                                                                    |
| 13.        |             |                                                                                    | 38.        |             |                                                                                    |
| 14.        |             |                                                                                    | 39.        |             |                                                                                    |
| 15.        |             |                                                                                    | 40.        |             |                                                                                    |
| 16.        |             |                                                                                    | 41.        |             |                                                                                    |
| 17.        |             |                                                                                    | 42.        |             |                                                                                    |
| 18.        |             |                                                                                    | 43.        |             |                                                                                    |
| 19.        |             |                                                                                    | 44.        |             |                                                                                    |
| 20.        |             |                                                                                    | 45.        |             |                                                                                    |
| 21.        |             |                                                                                    | 46.        |             |                                                                                    |
| 22.        |             |                                                                                    | 47.        |             |                                                                                    |
| 23.        |             |                                                                                    | 48.        |             |                                                                                    |
| 24.        |             |                                                                                    | 49.        |             |                                                                                    |
| 25.        |             |                                                                                    | 50.        |             |                                                                                    |

- A. Exposure to IPT/ART for less than one year during the follow-up period
- B. IPT interrupted and could not complete the six months regimen
- C. Transferred in, IPT completed, but no data on IPT start date
- D. Unexposed to ART during follow-up period
- E. Patient diagnosed with TB (had active TB) while starting ART
- F. Others (Specify)
